# Supplementary material for: KIF5A transports collagen vesicles of myofibroblasts during pleural fibrosis
Source: PubMed Central journal article supplement (PMC5496869; doi:10.1038/s41598-017-04437-7), 2017-07-04
Supplement: 41598_2017_4437_MOESM1_ESM.pdf [file 41598_2017_4437_MOESM1_ESM.pdf]

# **KIF5A transports collagen vesicles of myofibroblasts during pleural fibrosis**

Hirotohi Kamata<sup>1,2,3</sup>, Yoshikazu Tsukasaki<sup>1,3</sup>, Tsuyoshi Sakai<sup>1</sup>, Reiko Ikebe<sup>1</sup>, Julia Wang<sup>1</sup>, Ann Jeffers<sup>1</sup>, Jake Boren<sup>1</sup>, Shuzi Owens<sup>1</sup>, Takahiro Suzuki<sup>2</sup>, Masaaki Higashihara<sup>2</sup>, Steven Idell<sup>1</sup>, Torry A. Tucker<sup>1</sup> and Mitsuo Ikebe<sup>1,4</sup>

<sup>1</sup> Department of Cellular and Molecular Biology, University of Texas Health Science Center Northeast, 11937 US Highway 271, Tyler, Texas, 75708-3154, USA

<sup>2</sup> Department of Hematology, Kitasato University School of Medicine, 1-15-1 Kitasato, Minami-ku, Sagamihara, Kanagawa 252-0374, Japan

<sup>3</sup> Equally contributed

To whom correspondence should be addressed. E-mail: Mitsuo.Ikebe@uthct.edu

## Supplementary Information

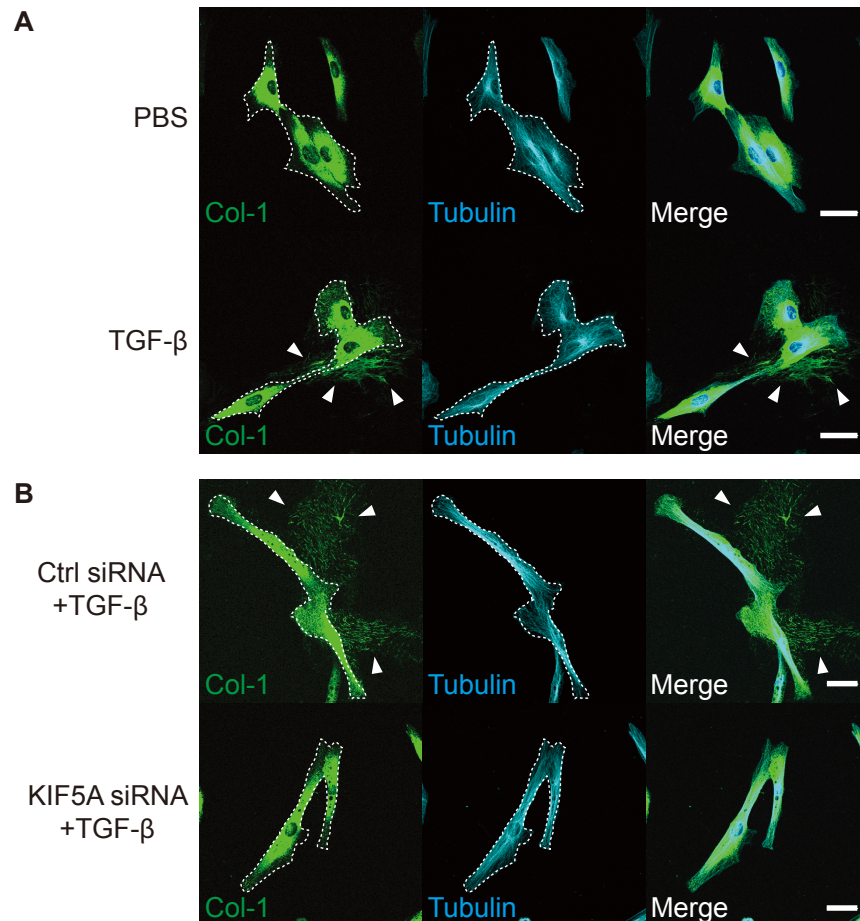

**Supplementary Fig. S1.** Immunofluorescent images of collagen secretion from HPMC.

(A) Confocal images of collagen secretion in HPMCs with or without TGF- $\beta$  stimulation.

White dotted lines indicate the edge of cells. White arrowheads represent secreted collagen

in outside of cells. Scale bar; 40  $\mu$ m. (B) Effect of KIF5A KD on collagen secretion of

HPMCs treated with control siRNA and KIF5A siRNA after TGF- $\beta$  stimulation. White dotted

lines indicate the edge of cells. White arrowheads represent secreted collagen in outside of

cells. Scale bar; 40  $\mu$ m.

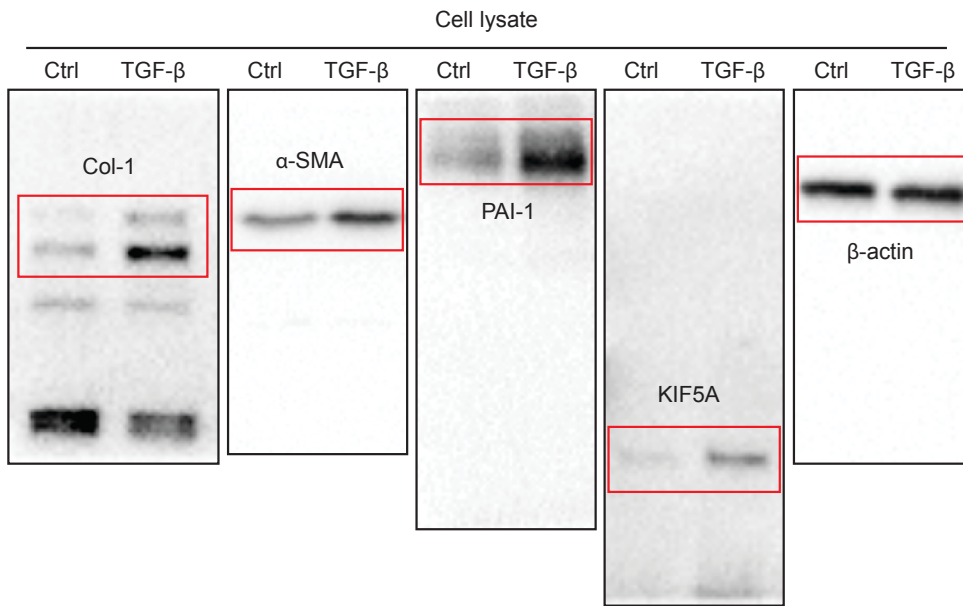

**Supplementary Fig. S2.** Full-length blots for Figure 1B.

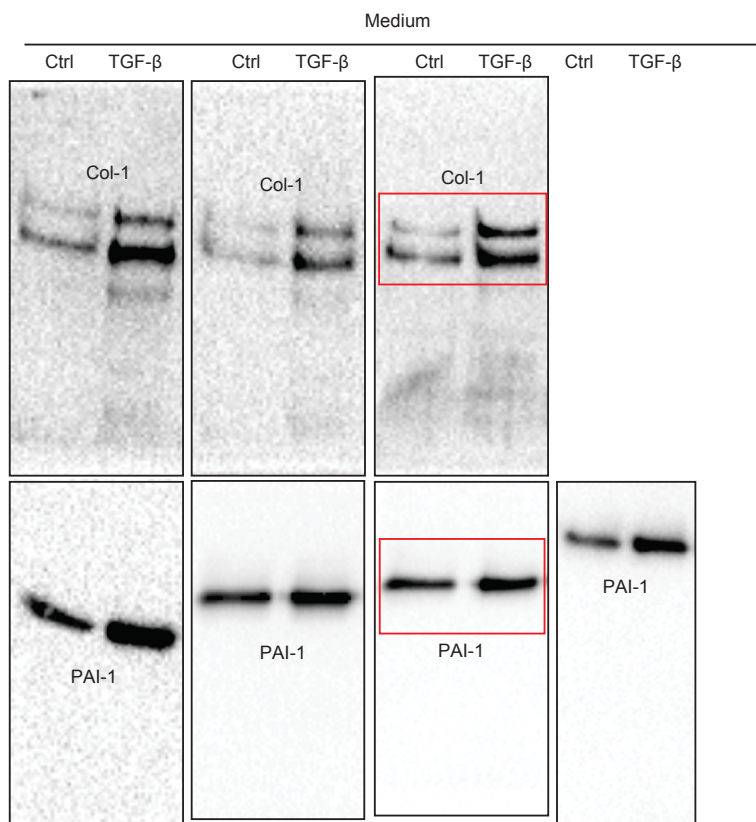

**Supplementary Fig. S3.** Full-length blots for Figure 1C.

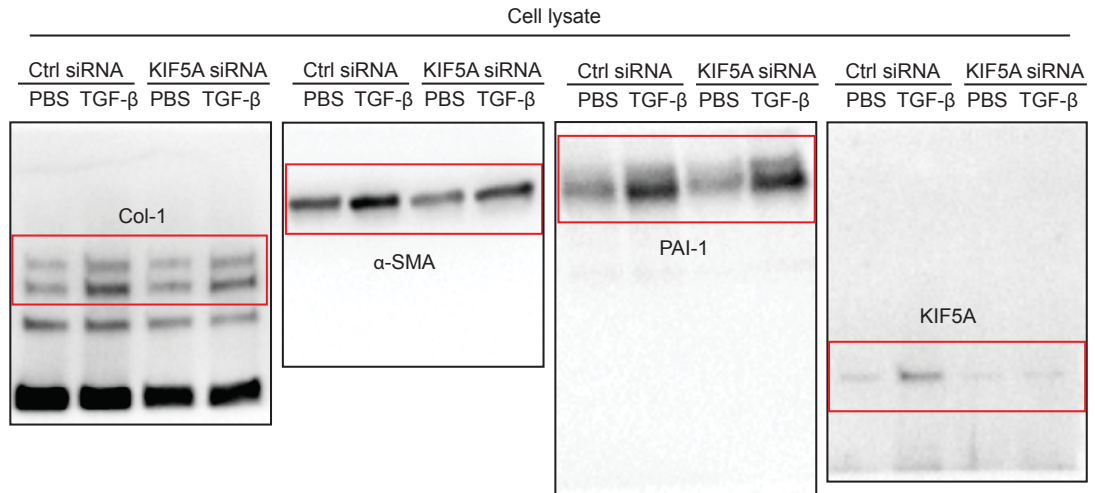

**Supplementary Fig. S4.** Full-length blots for Figure 4B.

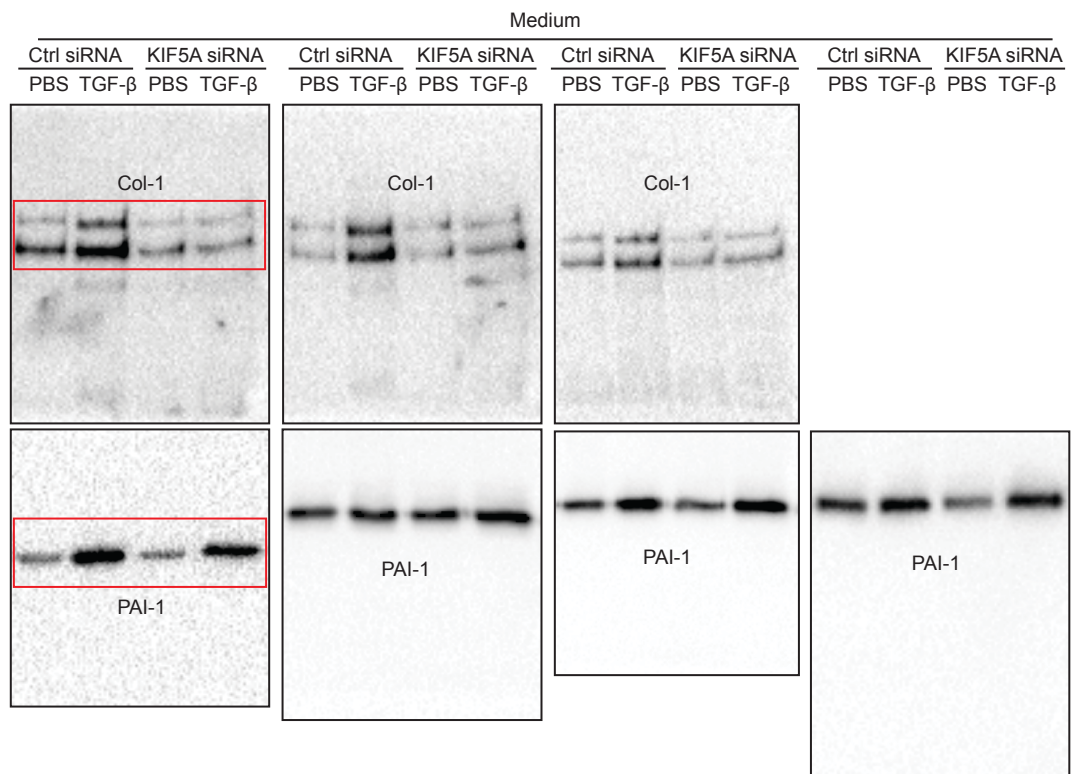

**Supplementary Fig. S5.** Full-length blots for Figure 4C.



**Supplementary Video 1.** Dual color live cell imaging of Col-1 (Green) and KIF5A (Red).

Scale bar; 10  $\mu\text{m}$ . Time stamp; min:sec.

**Supplementary Video 2.** Movements of filamentous Col-1 (Green). Scale bar; 10  $\mu\text{m}$ .

Time stamp; min:sec.
